# Supplementary material for: Satellite telemetry of surface ablation observations to inform spatial melt modelling, Place Glacier, British Columbia, Canada
Source: Copernicus journal article supplement (doi:10.5194/egusphere-2025-2702), 2025-06-27
Supplement: Supplementary file 1 [file egusphere-2025-2702-supplement.pdf]

5 *Supplement of*  
**Satellite telemetry of surface ablation observations to inform spatial  
melt modelling, Place Glacier, British Columbia, Canada**  
Alexandre R. Bevington<sup>1,2</sup>, Brian Menounos<sup>1,3,4</sup>, and Mark Ednie<sup>5</sup>

10

1     Parts list

**Table S1: Primary components of the smart stakes with prices in USD from June 6, 2025. This list does not include a detailed breakdown of the minor components nor the ablation pole hardware.**

| PART                                                                                     | COST (USD)     | URL                                                                                                                   |
|------------------------------------------------------------------------------------------|----------------|-----------------------------------------------------------------------------------------------------------------------|
| Feather M0 Adalogger                                                                     | 19.95          | <a href="https://www.adafruit.com/product/2796">https://www.adafruit.com/product/2796</a>                             |
| Featherwing Terminal Block                                                               | 14.95          | <a href="https://www.adafruit.com/product/2926">https://www.adafruit.com/product/2926</a>                             |
| PCF8523 Real Time Clock                                                                  | 6.95           | <a href="https://www.adafruit.com/product/3295">https://www.adafruit.com/product/3295</a>                             |
| Lithium Ion Battery – 3.7V 10050mAh (10 Ah)                                              | 29.95          | <a href="https://www.adafruit.com/product/5035">https://www.adafruit.com/product/5035</a>                             |
| Adafruit Solar Lithium Ion/Polymer Charger                                               | 14.95          | <a href="https://www.adafruit.com/product/4755">https://www.adafruit.com/product/4755</a>                             |
| Medium 6V 2W Solar panel – 2.0 Watt                                                      | 34.00          | <a href="https://www.adafruit.com/product/200">https://www.adafruit.com/product/200</a>                               |
| Nano Power Timer TPL5110                                                                 | 6.95           | <a href="https://www.sparkfun.com/products/15353">https://www.sparkfun.com/products/15353</a>                         |
| RockBlock 9603                                                                           | 299.95         | <a href="https://www.adafruit.com/product/4521">https://www.adafruit.com/product/4521</a>                             |
| Ultrasonic (w. 6ft 7–Strand Shielded Cable)                                              | 293.00         | <a href="https://maxbotix.com/products/mb7374">https://maxbotix.com/products/mb7374</a>                               |
| Temp/RH                                                                                  | 29.50          | <a href="https://www.dfrobot.com/product-912.html">https://www.dfrobot.com/product-912.html</a>                       |
| Radiation shield                                                                         | 91.32          | <a href="https://hoskin.ca/product/solar-radiation-shield-2/">https://hoskin.ca/product/solar-radiation-shield-2/</a> |
| Additional minor components (enclosure, desiccant, hose clamps, connection cables, etc.) | 200.00         | <u>Miscellaneous</u>                                                                                                  |
| <b>Total</b>                                                                             | <b>1041.47</b> |                                                                                                                       |

2    Validation

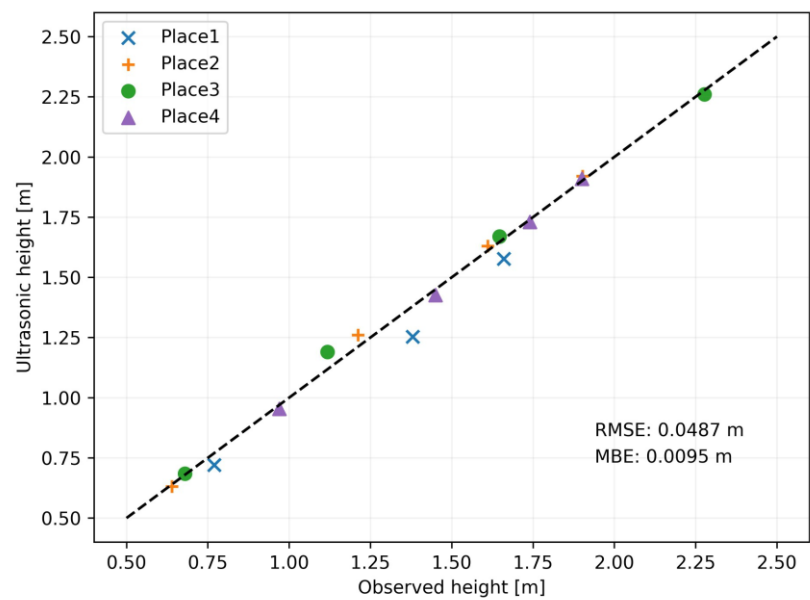

**Figure S1: In-situ manual calibration of MaxBotix MB7374 ultrasonic sensor readings. The root mean square error (RMSE) and the mean bias error (MBE) are shown.**

20

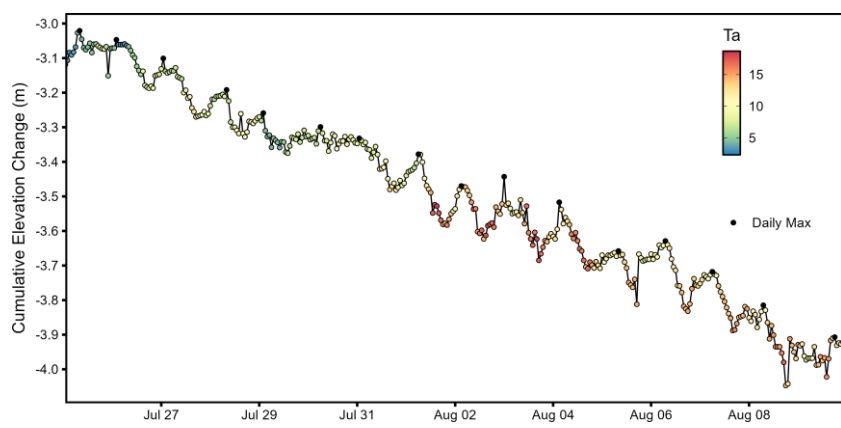

**Figure S2: Time series of cumulative elevation change in meters since installation at Place Glacier 1. The points are colored by air temperature.**

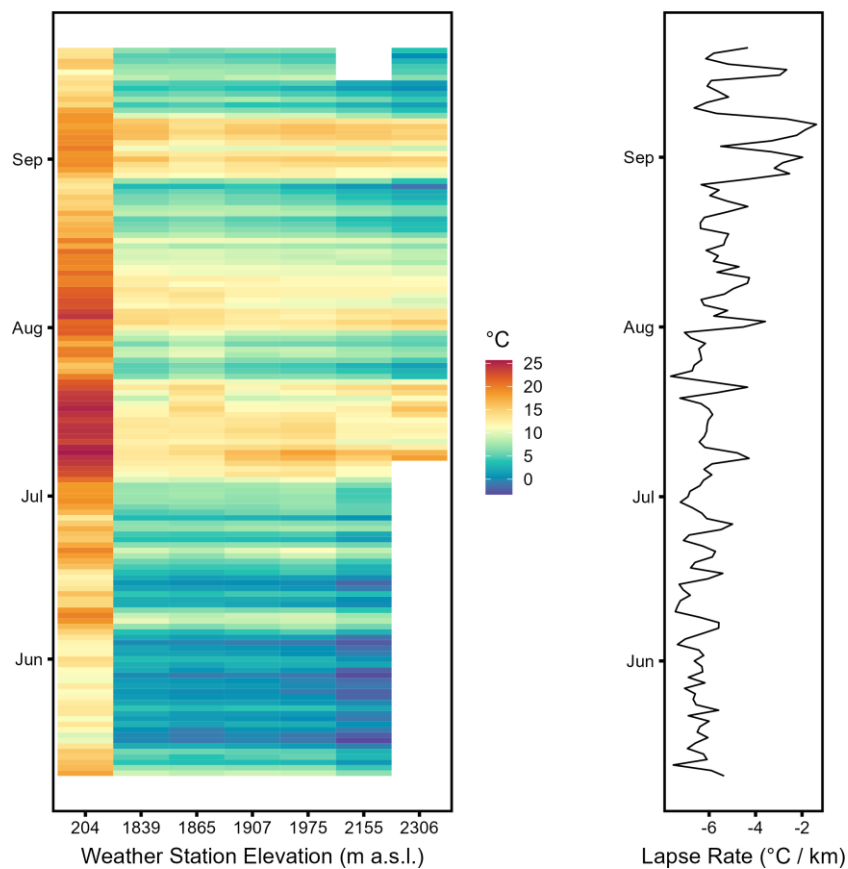

**Figure S3: Average daily air temperature at the seven monitoring locations (see Error! Reference source not found.). The daily air t emperature lapse rates are shown.**

4 Spatial Melt Model

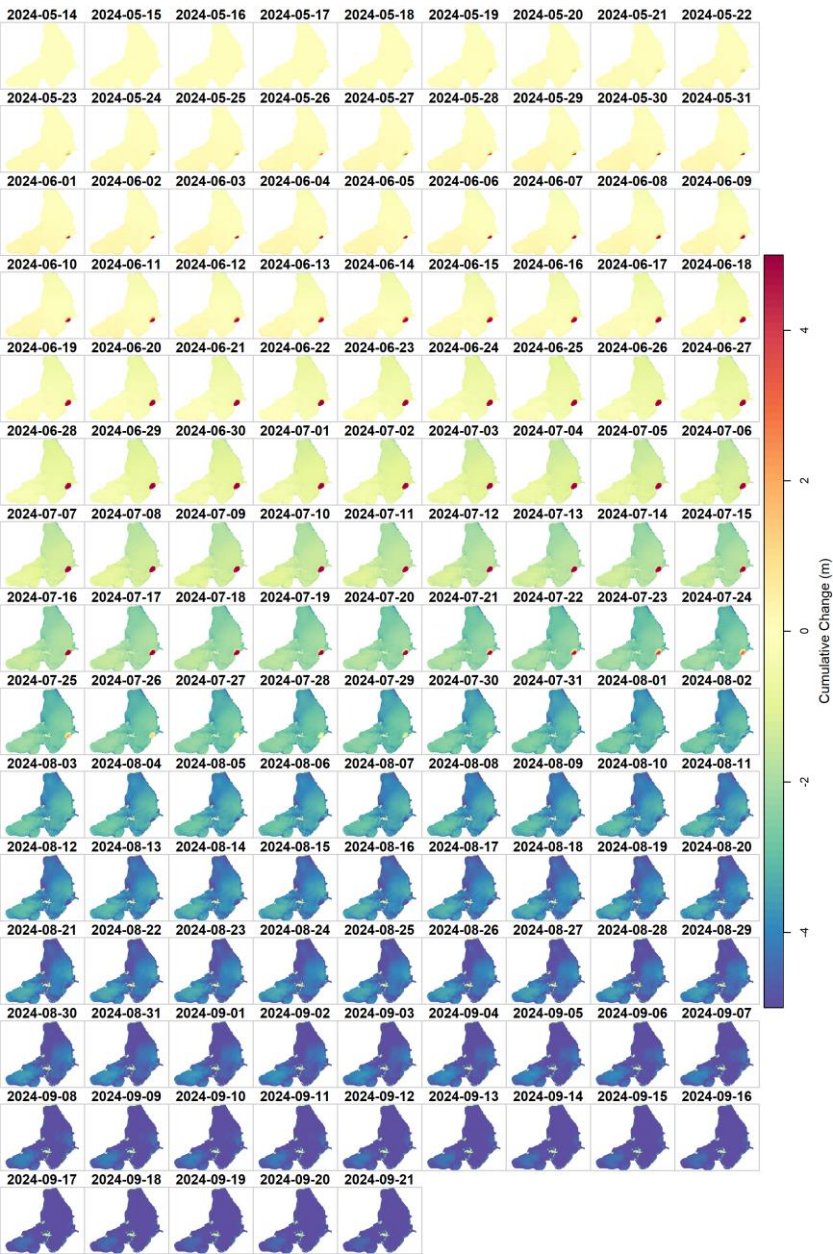

Figure S4: Interpolated daily 5 m resolution lidar digital elevation model from May 14 to September 21, 2024. The timeseries is expressed as the cumulative change from May 14, 2024.

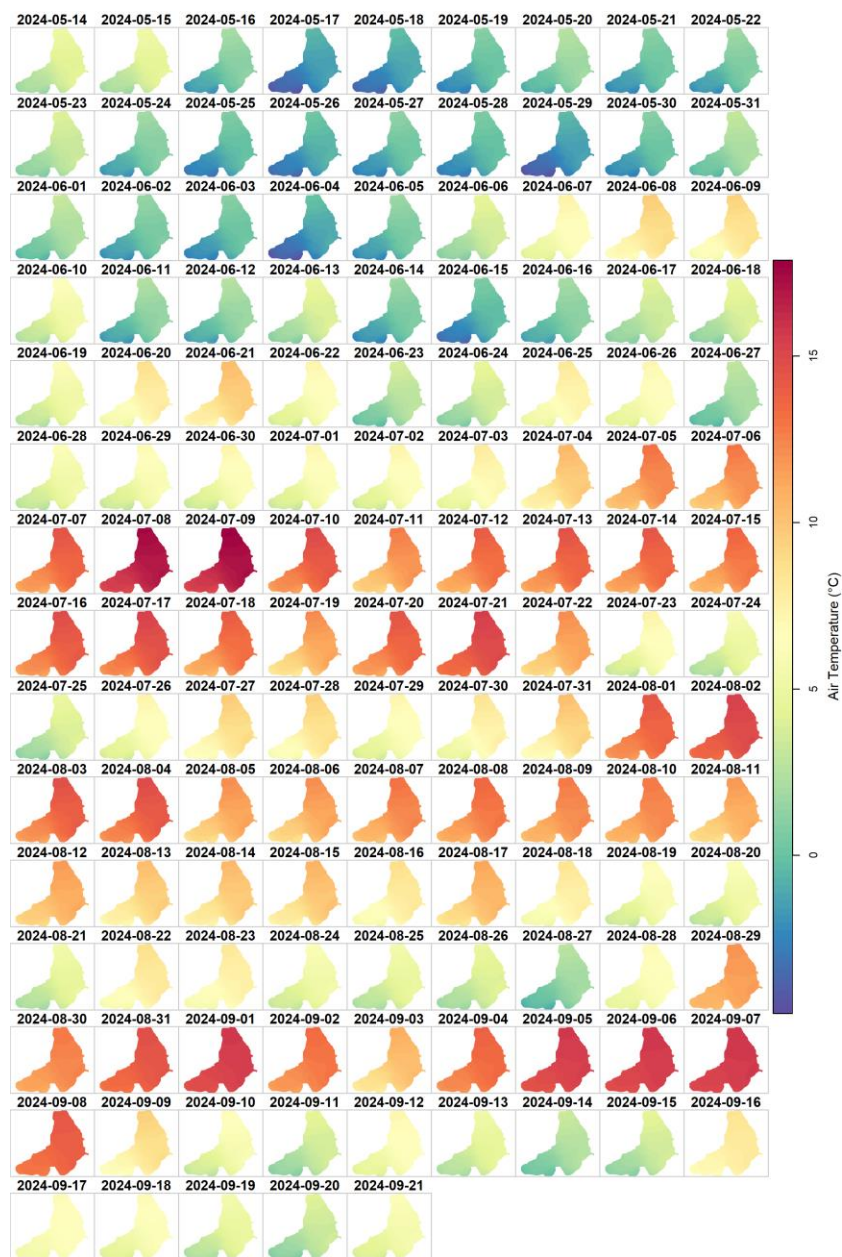

35 Figure S5: Interpolated daily 5 m resolution average air temperature model from May 14 to September 21, 2024.

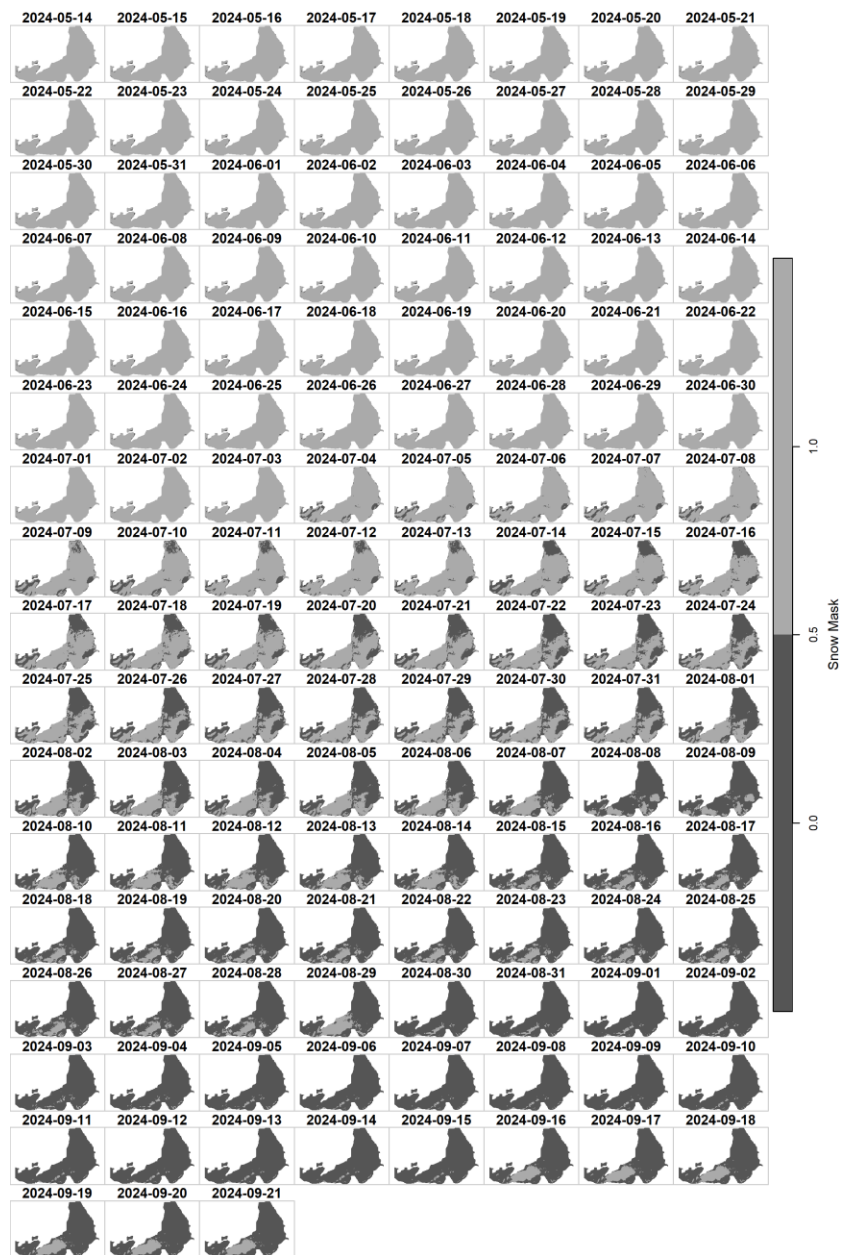

**Figure S6: Interpolated daily 5 m resolution snow and ice cover classification from May 14 to September 21, 2024.**



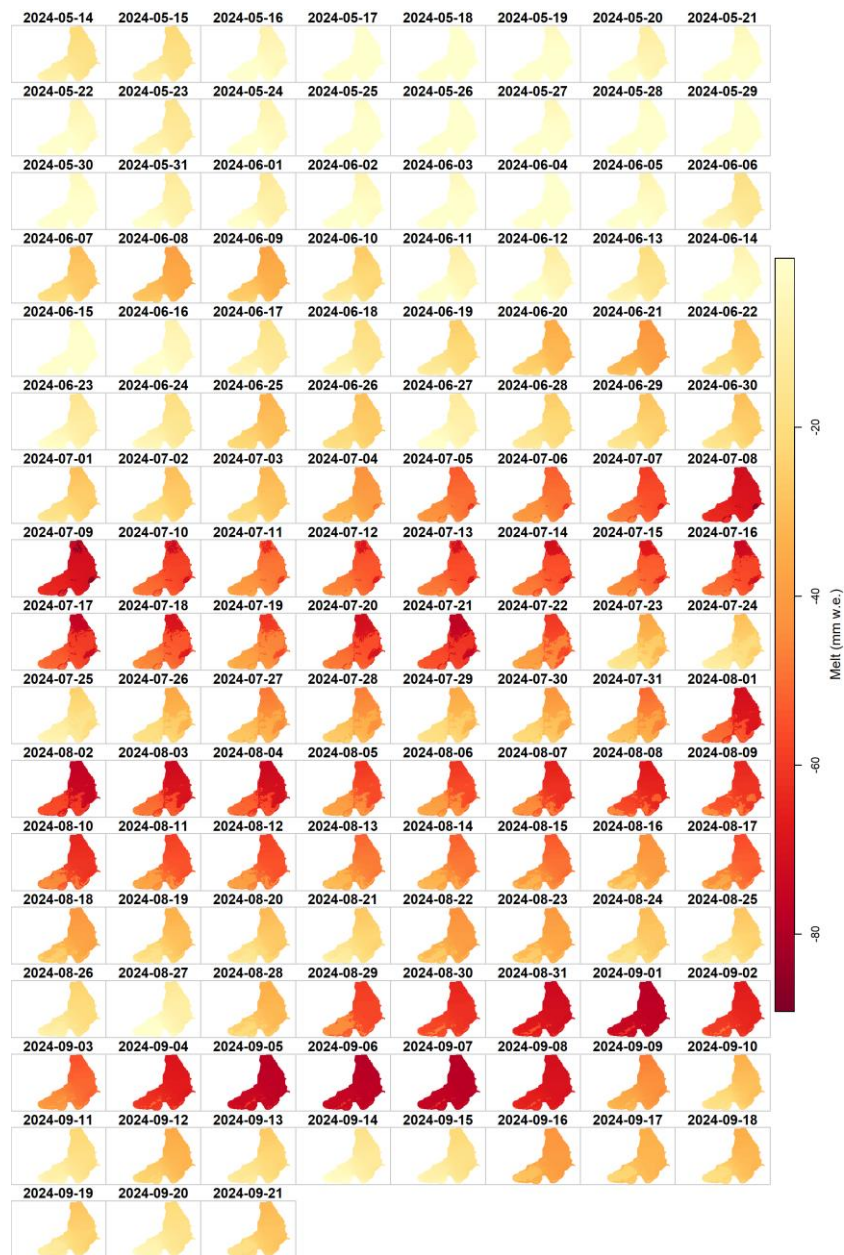

Figure S7: Daily 5 m resolution temperature-index melt model from May 14 to September 21, 2024.



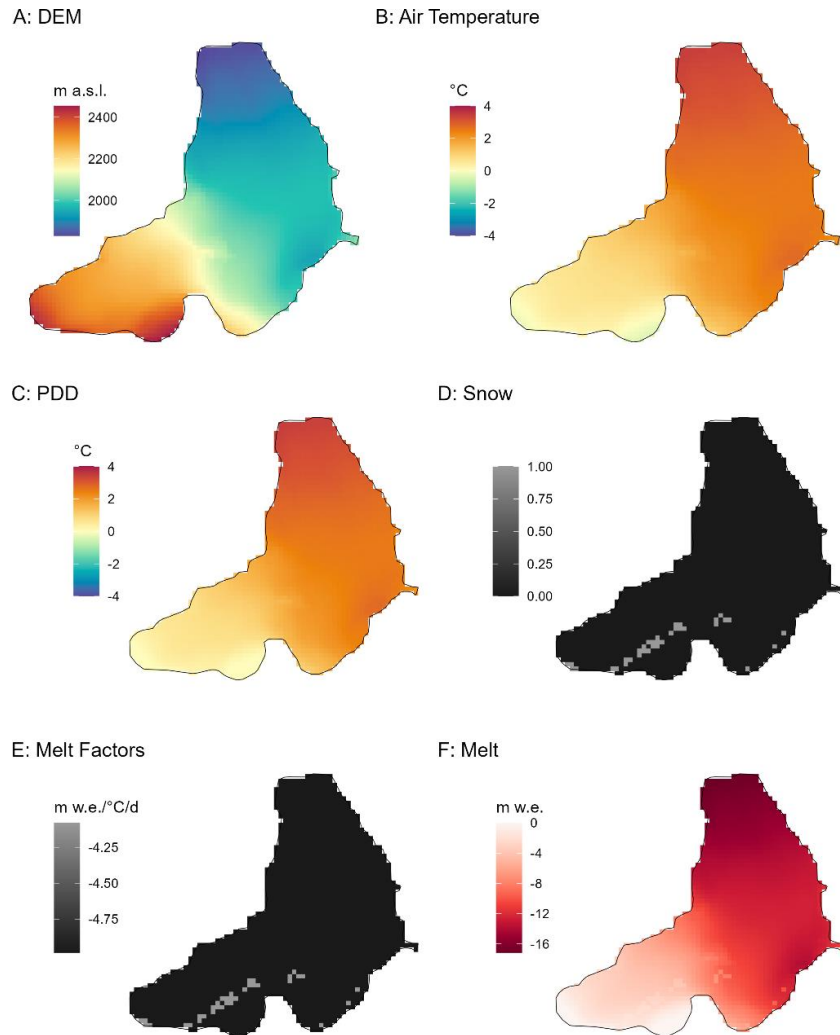

**Figure S8: Example of the spatial melt model calculations for September 14, 2024. A) Digital Elevation Model; B) Air temperature; C) Positive Degree Days; D) Snow mask; E) Melt coefficients; and F) total daily melt.**
